# Supplementary material
Source: Springer Nature journal article supplement (https://www.springermedizin.de/resource/supplementary/12936_2010_1792_MOESM1_ESM.pdf/9541766)
Supplement: MOESM1 [file 9541766]

A Venn diagram with two overlapping circles. The left circle is labeled 'CAUSES OF OTHER FEVER' and contains a list of four items. The right circle is labeled 'CAUSES OF MALARIA ATTRIBUTABLE FEVER' and contains a list of one item. The overlapping area in the center contains a list of three items.

**CAUSES OF  
OTHER FEVER**

- Skin Infection
- Too much sun
- Swimming in dirty water
- Doing too much work

- Consuming contaminated food and water
- Cold wet weather
- Poor hygiene practices

**CAUSES OF  
MALARIA  
ATTRIBUTABLE  
FEVER**

- Mosquitoes
